# Supplementary material for: Annual maps of forest cover in the Brazilian Amazon from analyses of PALSAR and MODIS images
Source: Copernicus journal article supplement (doi:10.5194/essd-16-321-2024), 2024-01-15
Supplement: Supplementary file 1 [file essd-16-321-2024-supplement.pdf]

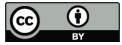

*Supplement of*

## **Annual maps of forest cover in the Brazilian Amazon from analyses of PALSAR and MODIS images**

**Yuanwei Qin et al.**

*Correspondence to:* Xiangming Xiao ([xiangming.xiao@ou.edu](mailto:xiangming.xiao@ou.edu))

The copyright of individual parts of the supplement might differ from the article licence.

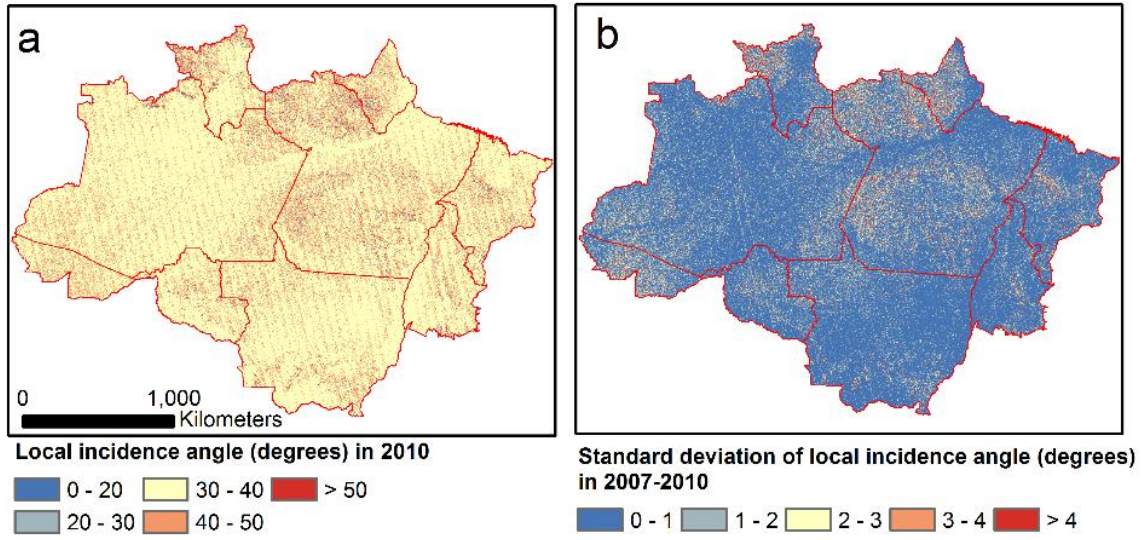

**Fig. S1.** Spatial distribution maps of ALOS PALSAR data local incidence angle in 2010 (a) and the standard deviation of local incidence angle from 2007 to 2010 (b).

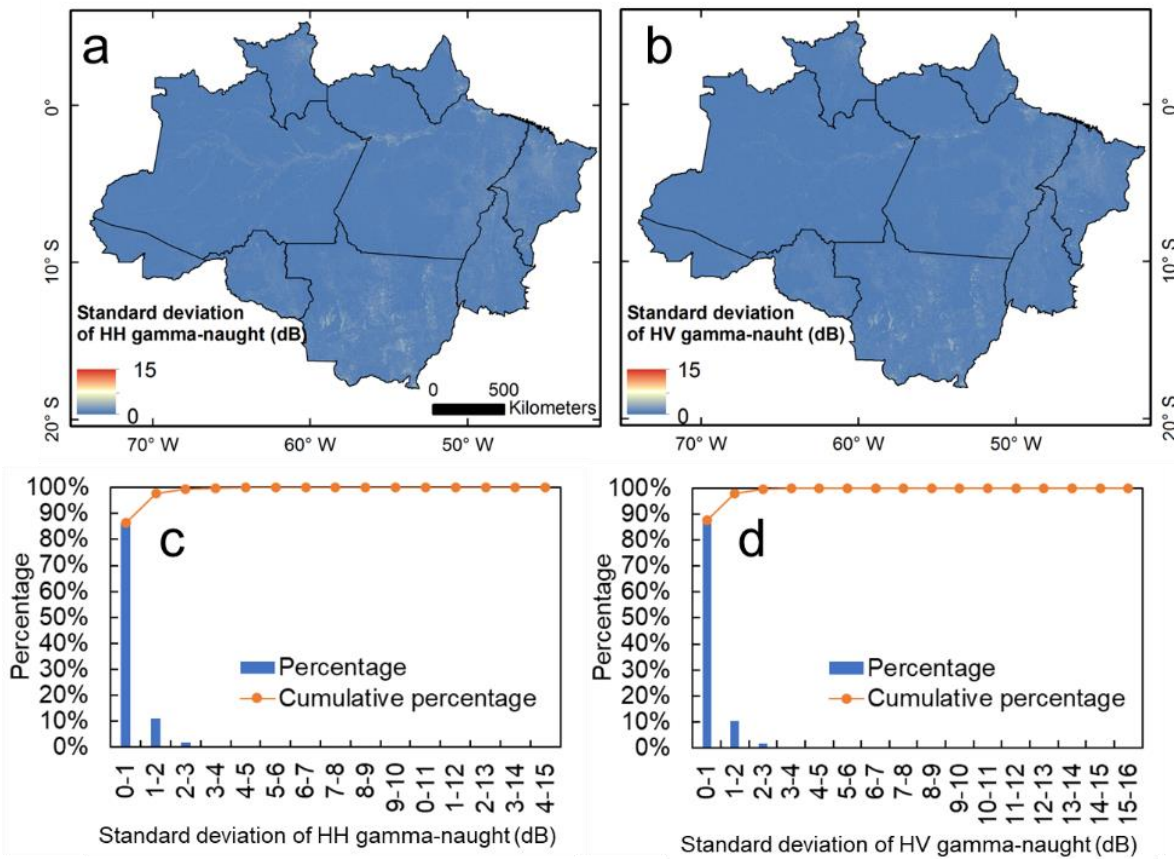

**Fig. S2.** Spatial distribution maps of the standard deviation of PALSAR HH and HV gamma-naught (a, b) and their histograms (c, d) during 2007-2010.

**Table S1.** Error matrices of PALSAR/MODIS forest cover and MODIS evergreen forest cover maps in the Brazilian Amazon in 2010.

| Reference data name                            | Forest products | Classification         | Reference |            |                         | User's accuracy (%) | Producer's accuracy (%) | Overall accuracy (%) |
|------------------------------------------------|-----------------|------------------------|-----------|------------|-------------------------|---------------------|-------------------------|----------------------|
|                                                |                 |                        | Forest    | Non-forest | Total classified pixels |                     |                         |                      |
| Global Land Cover Validation Reference Dataset | PALSAR/MODIS    | Forest                 | 105669    | 4409       | 110078                  | 95.99               | 92.07                   | 90.93                |
|                                                |                 | Non-forest             | 9152      | 29994      | 39146                   | 76.62               | 87.12                   |                      |
|                                                |                 | Total reference pixels | 114821    | 34403      | 149224                  |                     |                         |                      |
|                                                | MODIS evergreen | Forest                 | 960       | 26         | 986                     | 97.36               | 98.52                   | 97.02                |
|                                                |                 | Non-forest             | 11        | 271        | 282                     | 96.10               | 93.17                   |                      |
|                                                |                 | Total reference pixels | 971       | 297        | 1268                    |                     |                         |                      |
| TREES-3                                        | PALSAR/MODIS    | Forest                 | 11644400  | 1113740    | 12758140                | 91.27               | 95.96                   | 90.71                |
|                                                |                 | Non-forest             | 470115    | 3860304    | 4330419                 | 89.14               | 78.31                   |                      |
|                                                |                 | Total reference pixels | 12114515  | 4974044    | 17088559                |                     |                         |                      |
|                                                | MODIS evergreen | Forest                 | 107638    | 1288       | 108926                  | 98.82               | 99.09                   | 98.48                |
|                                                |                 | Non-forest             | 544       | 21948      | 22492                   | 97.58               | 96.86                   |                      |
|                                                |                 | Total reference pixels | 108182    | 23236      | 131418                  |                     |                         |                      |
